# Supplementary material for: Mortality during a Large-Scale Heat Wave by Place, Demographic Group, Internal and External Causes of Death, and Building Climate Zone
Source: MDPI journal article supplement (doi:10.3390/ijerph13030299), 2016-03-09
Supplement: s1 [file s1]

# Supplementary Materials: Mortality during a Large-Scale Heat Wave by Place, Demographic Group, Internal and External Causes of Death, and Building Climate Zone

Lauren Joe, Sumi Hoshiko, Dina Dobraca, Rebecca Jackson, Svetlana Smorodinsky, Daniel Smith and Martha Harnly

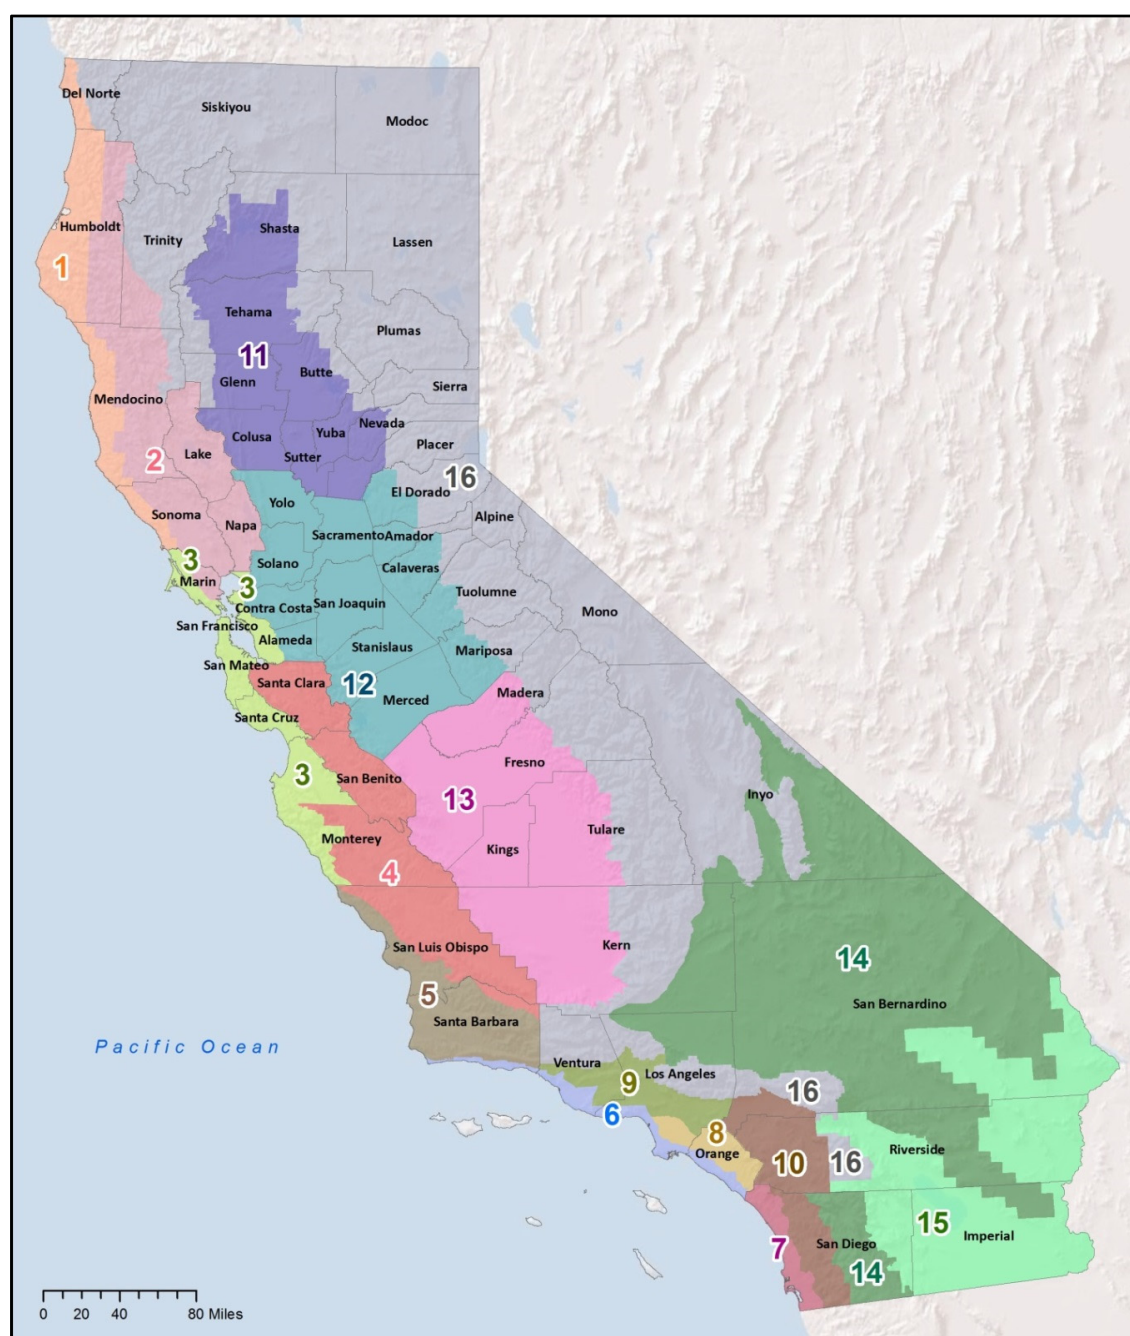

**Figure S1.** California counties and sixteen building climate zones \*. Note: \* Boundaries from: California Energy Commission (CEC), California Energy Maps—California Building Climate Zone Areas [1].

**Table S1.** Total, at-home, and non-at-home <sup>a</sup> mortality by demographic variables (sex, race/ethnicity, 10-year age groups): Heat wave and reference day death counts, relative risks, 95% confidence intervals (CI), and excess deaths.

|                                 | Total Mortality        |                          |                    |                            | At-Home Mortality |             |                    |               | Non-at-Home Mortality |             |                    |               |
|---------------------------------|------------------------|--------------------------|--------------------|----------------------------|-------------------|-------------|--------------------|---------------|-----------------------|-------------|--------------------|---------------|
|                                 | Heat Wave <sup>b</sup> | Reference/2 <sup>c</sup> | Relative Risk (CI) | Excess Deaths <sup>d</sup> | Heat Wave         | Reference/2 | Relative Risk (CI) | Excess Deaths | Heat Wave             | Reference/2 | Relative Risk (CI) | Excess Deaths |
| <b>Sex</b>                      |                        |                          |                    |                            |                   |             |                    |               |                       |             |                    |               |
| Males                           | 6080                   | 5698                     | 1.07 (1.03–1.10)   | 382                        | 1878              | 1692        | 1.11 (1.05–1.17)   | 186           | 4119                  | 3933        | 1.05 (1.01–1.09)   | 186           |
| Females                         | 5647                   | 5446                     | 1.04 (1.00–1.07)   | 201                        | 1768              | 1571        | 1.13 (1.06–1.19)   | 197           | 3838                  | 3821        | 1.00 (0.97–1.04)   | 16            |
| <b>Race/Ethnicity</b>           |                        |                          |                    |                            |                   |             |                    |               |                       |             |                    |               |
| White                           | 7876                   | 7586                     | 1.04 (1.01–1.07)   | 290                        | 2667              | 2374        | 1.12 (1.07–1.18)   | 293           | 5120                  | 5119        | 1.00 (0.97–1.03)   | 1.5           |
| Black                           | 948                    | 897                      | 1.06 (0.98–1.14)   | 51                         | 230               | 218         | 1.06 (0.90–1.24)   | 12            | 704                   | 669         | 1.05 (0.96–1.15)   | 35            |
| Hispanic                        | 1908                   | 1691                     | 1.13 (1.07–1.19)   | 217                        | 488               | 436         | 1.12 (1.00–1.25)   | 52            | 1407                  | 1241        | 1.13 (1.06–1.21)   | 166           |
| Asian, Hawaiian/PI              | 875                    | 848                      | 1.03 (0.95–1.12)   | 27                         | 226               | 195         | 1.16 (0.99–1.37)   | 31            | 643                   | 648         | 0.99 (0.90–1.09)   | –5            |
| Other, Multi, AIAN <sup>e</sup> | 120                    | 122                      | 0.98 (0.79–1.22)   | –2                         | 35                | 40          | 0.86 (0.58–1.28)   | –5            | 84                    | 78          | 1.06 (0.81–1.38)   | 5             |
| <b>Age</b>                      |                        |                          |                    |                            |                   |             |                    |               |                       |             |                    |               |
| Less than 5                     | 171                    | 174                      | 0.99 (0.82–1.18)   | –3                         | 6                 | 15          | 0.40 (0.17–0.96)   | –9            | 164                   | 157         | 1.04 (0.86–1.26)   | 7             |
| 5–14                            | 42                     | 46                       | 0.92 (0.64–1.33)   | –4                         | 6                 | 9           | 0.71 (0.28–1.79)   | –3            | 34                    | 36          | 0.94 (0.63–1.42)   | –2            |
| 15–24                           | 232                    | 214                      | 1.09 (0.93–1.28)   | 18                         | 19                | 25          | 0.76 (0.45–1.29)   | –6            | 203                   | 183         | 1.11 (0.93–1.32)   | 20            |
| 25–34                           | 254                    | 229                      | 1.11 (0.95–1.29)   | 25                         | 46                | 39          | 1.16 (0.81–1.68)   | 7             | 204                   | 183         | 1.11 (0.94–1.32)   | 21            |
| 35–44                           | 503                    | 428                      | 1.18 (1.05–1.31)   | 75                         | 122               | 114         | 1.07 (0.86–1.33)   | 8             | 373                   | 307         | 1.21 (1.07–1.38)   | 66            |
| 45–54                           | 1011                   | 936                      | 1.08 (1.00–1.17)   | 75                         | 335               | 309         | 1.08 (0.95–1.24)   | 26            | 664                   | 613         | 1.08 (0.98–1.19)   | 51            |
| 55–64                           | 1423                   | 1269                     | 1.12 (1.05–1.20)   | 154                        | 514               | 433         | 1.19 (1.06–1.32)   | 81            | 894                   | 821         | 1.09 (1.00–1.18)   | 73            |
| 65–74                           | 1794                   | 1725                     | 1.04 (0.98–1.10)   | 69                         | 643               | 581         | 1.11 (1.01–1.22)   | 62            | 1133                  | 1119        | 1.01 (0.94–1.09)   | 14            |
| 75–84                           | 3064                   | 2949                     | 1.04 (0.99–1.09)   | 115                        | 1039              | 913         | 1.14 (1.06–1.23)   | 126           | 1992                  | 2004        | 0.99 (0.94–1.05)   | –13           |
| 85+                             | 3233                   | 3174                     | 1.02 (0.98–1.06)   | 59                         | 916               | 825         | 1.11 (1.02–1.20)   | 91            | 2296                  | 2327        | 0.99 (0.94–1.04)   | –31           |

Notes: <sup>a</sup> There were 7957 heat wave deaths that did not occur at home. Non-at-home deaths included deaths that occurred inside a hospital, at hospice or nursing, or other place outside of a hospital. Deaths that occurred at unknown places were not included; <sup>b</sup> Deaths that occurred between 15 July to 1 August 2006; <sup>c</sup> Deaths that occurred on same-summer reference days divided by two and then rounded for presentation; <sup>d</sup> Heat wave deaths minus reference day deaths; <sup>e</sup> Includes other, multi-race, and American Indian/Alaska Native race/ethnicities.

**Table S2.** Non-at-home <sup>a</sup> mortality by internal and external causes of death: Heat wave and reference day death counts, relative risks, confidence intervals, and excess deaths.

| Underlying Cause of Death (ICD-10 Codes) | Non-at-Home Mortality  |                          |                    |                            |
|------------------------------------------|------------------------|--------------------------|--------------------|----------------------------|
|                                          | Heat Wave <sup>a</sup> | Reference/2 <sup>b</sup> | Relative Risk (CI) | Excess Deaths <sup>c</sup> |
| <b>Internal Causes (A00–R94)</b>         | 7106                   | 7016                     | 1.01 (0.98–1.04)   | 90                         |
| Mental/nervous system (F00–H95)          | 672                    | 622                      | 1.08 (0.98–1.19)   | 50                         |
| Endocrine Disease (E00–88)               | 318                    | 327                      | 0.97 (0.85–1.11)   | –9                         |
| Respiratory system (J00–99)              | 790                    | 746                      | 1.06 (0.97–1.15)   | 44                         |
| Other internal diseases (L00–R99)        | 419                    | 400                      | 1.05 (0.93–1.18)   | 19                         |
| Cardiovascular (I00–99)                  | 2839                   | 2880                     | 0.99 (0.94–1.03)   | –41                        |
| Digestive system (K00–92)                | 371                    | 358                      | 1.04 (0.92–1.18)   | 13                         |
| Neoplasms (C00–D48)                      | 1501                   | 1486                     | 1.01 (0.95–1.07)   | 15                         |
| Infectious and parasitic (A00–B99)       | 196                    | 197                      | 0.99 (0.84–1.18)   | –1                         |
| <b>External Causes (V01–Y89.9)</b>       | 851                    | 738                      | 1.15 (1.06–1.25)   | 113                        |
| <b>External Causes, Excluding X30</b>    | 797                    | 732                      | 1.09 (1.00–1.19)   | 65                         |
| Related to extreme heat (X30)            | 54                     | 6                        | 9.00 (4.81–16.82)  | 48                         |
| Accidental drowning (W65–74)             | 47                     | 41                       | 1.16 (0.81–1.66)   | 6                          |
| Accidental poisoning (X40–49)            | 94                     | 76                       | 1.25 (0.96–1.61)   | 18                         |
| Homicide (X85–Y09, Y87.1)                | 151                    | 124                      | 1.21 (0.99–1.48)   | 27                         |
| Falls (W00–19)                           | 84                     | 74                       | 1.14 (0.87–1.49)   | 10                         |
| Transport accidents (V01–99, Y85)        | 269                    | 260                      | 1.03 (0.89–1.2)    | 9                          |
| Other external <sup>d</sup>              | 77                     | 73                       | 1.05 (0.8–1.39)    | 4                          |
| Suicide (X60–84, Y87.0)                  | 75                     | 85                       | 0.88 (0.67–1.16)   | –10                        |

Notes: <sup>a</sup> There were 7957 heat wave deaths that did not occur at home. Non-at-home deaths included deaths that occurred inside a hospital, at hospice or nursing, or other place outside of a hospital. Deaths that occurred at unknown places were not included; <sup>b</sup> Deaths that occurred between 15 July to 1 August 2006; <sup>c</sup> Deaths that occurred on same-summer reference days divided by two and then rounded for presentation; <sup>d</sup> Other external cases include ICD-10 codes for other/unspecified accidents, and causes of undetermined intent/legal intervention, or medical/surgical complications (Y10–Y35, Y40–Y84, Y87.2, Y88, Y89.0, Y89.9).

**Table S3.** Average daily apparent temperature (ADAT) during heat wave (HW) <sup>a</sup> and reference days <sup>b</sup> by building climate zone.

| Building Climate Zone | Number of Weather Stations | HW ADAT (°F) | Peak HW ADAT (°F) <sup>c</sup> | Reference Days ADAT (°F) | ADAT Differential (°F) <sup>d</sup> | Peak HW ADAT Differential (°F) <sup>e</sup> | HW Duration (Days) <sup>f</sup> |
|-----------------------|----------------------------|--------------|--------------------------------|--------------------------|-------------------------------------|---------------------------------------------|---------------------------------|
| 1                     | 6                          | 69           | 81                             | 58                       | 11                                  | 23                                          | 14                              |
| 2                     | 34                         | 72           | 85                             | 64                       | 8                                   | 10                                          | 16                              |
| 3                     | 32                         | 65           | 72                             | 58                       | 7                                   | 14                                          | 16                              |
| 4                     | 29                         | 74           | 82                             | 65                       | 9                                   | 17                                          | 16                              |
| 5                     | 24                         | 70           | 76                             | 62                       | 8                                   | 15                                          | 16                              |
| 6                     | 24                         | 69           | 74                             | 62                       | 7                                   | 11                                          | 18                              |
| 7                     | 21                         | 73           | 78                             | 66                       | 7                                   | 12                                          | 18                              |
| 8                     | 11                         | 75           | 79                             | 68                       | 7                                   | 11                                          | 18                              |
| 9                     | 27                         | 76           | 84                             | 69                       | 7                                   | 15                                          | 16                              |
| 10                    | 26                         | 77           | 84                             | 71                       | 6                                   | 13                                          | 15                              |
| 11                    | 38                         | 81           | 87                             | 73                       | 3                                   | 14                                          | 16                              |
| 12                    | 65                         | 78           | 88                             | 69                       | 9                                   | 19                                          | 14                              |
| 13                    | 55                         | 82           | 88                             | 75                       | 7                                   | 13                                          | 16                              |
| 14                    | 47                         | 80           | 85                             | 75                       | 5                                   | 10                                          | 14                              |
| 15                    | 32                         | 89           | 94                             | 86                       | 3                                   | 8                                           | 15                              |
| 16                    | 161                        | 73           | 78                             | 65                       | 8                                   | 13                                          | 15                              |

Notes: <sup>a</sup> 15 July to 1 August 2006; <sup>b</sup> The same-summer reference days were chosen from the rest of the summer (1 June to 31 August 2006), excluding a holiday period (1–5 July) and the week directly after the heat wave period. Reference days were matched by day-of-the-week at a ratio of two reference days to each heat wave day; <sup>c</sup> During peak of heat wave, 22–24 July 2006; <sup>d</sup> ADAT during the heat wave minus ADAT on reference days; <sup>e</sup> ADAT during peak of the heat wave minus ADAT on reference days; <sup>f</sup> Number of consecutive days including and following 15 July 2006 when ADAT > ADAT on reference days.

**Table S4.** Mortality restricted to internal causes <sup>a</sup> by demographic variables (sex, race/ethnicity, 10-year age groups) for all places of death: Heat wave <sup>b</sup> and reference day <sup>c</sup> death counts, relative risks (RR), 95% confidence intervals (CI), and excess deaths <sup>d</sup>. (*n* = 10,575 deaths due to internal causes during heat wave <sup>a</sup>).

|                                 | Heat Wave <sup>b</sup> | Reference/2 <sup>c</sup> | Relative Risk (CI) | Excess Deaths <sup>d</sup> |
|---------------------------------|------------------------|--------------------------|--------------------|----------------------------|
| <b>Sex</b>                      |                        |                          |                    |                            |
| Males                           | 5258                   | 4992                     | 1.05 (1.02, 1.09)  | 266                        |
| Females                         | 5317                   | 5175                     | 1.03 (0.99, 1.06)  | 142                        |
| <b>Race/Ethnicity</b>           |                        |                          |                    |                            |
| White                           | 7294                   | 7062                     | 1.03 (1.00, 1.06)  | 232                        |
| Black                           | 811                    | 800                      | 1.01 (0.93, 1.10)  | 11                         |
| Hispanic                        | 1558                   | 1417                     | 1.10 (1.03, 1.17)  | 141                        |
| Asian, Hawaiian/PI              | 805                    | 785                      | 1.03 (0.94, 1.12)  | 20                         |
| Other, Multi, AIAN <sup>e</sup> | 107                    | 103                      | 1.03 (0.82, 1.31)  | 4                          |
| <b>10-Year Age Groups</b>       |                        |                          |                    |                            |
| Less than 5                     | 141                    | 149                      | 0.95 (0.77, 1.16)  | −8                         |
| 5–14                            | 27                     | 21                       | 1.29 (0.79, 2.09)  | 6                          |
| 15–24                           | 41                     | 43                       | 0.95 (0.66, 1.38)  | −2                         |
| 25–34                           | 110                    | 92                       | 1.19 (0.94, 1.51)  | 18                         |
| 35–44                           | 304                    | 283                      | 1.08 (0.94, 1.24)  | 21                         |
| 45–54                           | 802                    | 743                      | 1.08 (0.99, 1.18)  | 59                         |
| 55–64                           | 1290                   | 1168                     | 1.10 (1.03, 1.18)  | 122                        |
| 65–74                           | 1711                   | 1675                     | 1.02 (0.96, 1.08)  | 36                         |
| 75–84                           | 2982                   | 2876                     | 1.04 (0.99, 1.08)  | 106                        |
| 85+                             | 3167                   | 3117                     | 1.02 (0.97, 1.06)  | 50                         |

Notes: <sup>a</sup> There were 10,575 deaths due to internal causes during the heat wave. Internal causes of death are ICD-10 codes A00 to R94, which include mental/nervous system, endocrine disease, respiratory system, cardiovascular, digestive system, neoplasm, infection and parasitic, and other internal causes; <sup>b</sup> Deaths that occurred between 15 July to 1 August 2006; <sup>c</sup> Deaths that occurred on same-summer reference days divided by two and then rounded for presentation; <sup>d</sup> Heat wave deaths minus reference day deaths; <sup>e</sup> Includes other, multi-race, and American Indian/Alaska Native race/ethnicities.

## References

1. California Energy Maps. Available online: [http://www.energy.ca.gov/maps/renewable/building\\_climate\\_zones.html](http://www.energy.ca.gov/maps/renewable/building_climate_zones.html) (accessed 30 January 2013).

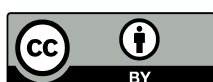

© 2016 by the authors; licensee MDPI, Basel, Switzerland. This article is an open access article distributed under the terms and conditions of the Creative Commons by Attribution (CC-BY) license (<http://creativecommons.org/licenses/by/4.0/>).
